# Supplementary material for: Systematic Comparison of Structural Characterization of Polysaccharides from Ziziphus Jujuba cv. Muzao
Source: MDPI journal article supplement (doi:10.3390/molecules28020562), 2023-01-05
Supplement: s1 [file s1]

# Systematic Comparison of Structural Characterization of Polysaccharides from *Ziziphus Jujuba cv. Muzao*

Xiaolong Ji <sup>1</sup>, Shuli Zhang <sup>1</sup>, Xueyuan Jin <sup>2</sup>, Chuanxue Yin <sup>1</sup>, Yang Zhang <sup>1</sup>, Xudan Guo <sup>3,\*</sup> and Ximeng Lin <sup>4,\*</sup>

<sup>1</sup> Henan Key Laboratory of Cold Chain Food Quality and Safety Control, Henan Collaborative Innovation Center for Food Production and Safety, College of Food and Bioengineering, Zhengzhou University of Light Industry, Zhengzhou 450001, China

<sup>2</sup> School of Clinical Medicine, Hainan Vocational University of Science and Technology, Haikou 571126, China

<sup>3</sup> Hebei Higher Education Institute Applied Technology Research Center on TCM Development and Industrialization, Hebei TCM Formula Preparation Technology Innovation Center, Basic Medical College, Hebei University of Chinese Medicine, Shijiazhuang 050200, China

<sup>4</sup> College of Food Science and Engineering, Northwest A&F University, Yangling 712100, China

\* Correspondence: guoxudan123@126.com (X.G.); ximenglin423@nwfau.edu.cn (X.L.)

**Table S1.** Methylation analysis data for *Zizyphus jujuba cv. Muzao* polysaccharides.

| Samples | Peak No. | Retention Time (min) | Methylated Sugars | Linkage Patterns | Relative Amount (mol%) | Ref. |
|---------|----------|----------------------|-------------------|------------------|------------------------|------|
| PZMP1   | 1        | 18.923               | 2,3,5-Me3-Araf    | Araf-(1→         | 16.44                  | [17] |
|         | 2        | 20.676               | 2,3,4,6-Me4-Glcp  | Galp-(1→         | 2.55                   |      |
|         | 3        | 24.030               | 2,4,5- Me3-Araf   | →3)-Araf-(1→     | 3.76                   |      |
|         | 4        | 25.979               | 2,3-Me2-Araf      | →5)-Araf-(1→     | 26.51                  |      |
|         | 5        | 29.170               | 2,3,4,6-Me4-Glcp  | Glcp-(1→         | 4.14                   |      |
|         | 6        | 30.438               | 2-Me-Araf         | →3,5)-Araf-(1→   | 29.81                  |      |
|         | 7        | 33.280               | 2,3,6-Me3-Glcp    | →4)-Galp-(1→     | 16.79                  |      |
| PZMP2-1 | 1        | 58.767               | 2,3,5-Me3-Araf    | Araf-(1→         | -                      | [18] |
|         | 2        | 65.832               | 2,3-Me2-Araf      | →5)-Araf-(1→     | -                      |      |
|         | 3        | 70.291               | 2-Me-Araf         | →3,5)-Araf-(1→   | -                      |      |
| PZMP2-2 | 1        | 36.257               | 2,3,4,6-Me4-Galp  | Galp-(1→         | 11.52                  | [19] |
|         | 2        | 40.142               | 2,4,5- Me3-Araf   | →3)-Araf-(1→     | 24.97                  |      |
|         | 3        | 56.720               | 3-Me-Rhap         | →2,4)-Rhap-(1→   | 11.86                  |      |
|         | 4        | 63.049               | 2,4,6-Me3-Galp    | →3)-Galp-(1→     | 19.2                   |      |
|         | 5        | 65.033               | 2,3,6-Me3-GalpA   | →4)-GalpA-(1→    | 18.16                  |      |
|         | 6        | 70.285               | 2-Me-Araf         | →3,5)-Araf-(1→   | 14.47                  |      |
| PZMP3-1 | 1        | 40.086               | 2,3,4-Me3-Rhap    | Rhap-(1→         | 7.45                   | [20] |
|         | 2        | 40.245               | 2,4,5-Me3-Araf    | →3)-Araf-(1→     | 5.72                   |      |
|         | 3        | 41.437               | 2,3-Me2-Araf      | →5)-Araf-(1→     | 39.75                  |      |
|         | 4        | 63.049               | 2,3,6-Me3-Galp    | →4)-Galp-(1→     | 16.5                   |      |
|         | 5        | 65.037               | 2,4,6-Me3-GalpA   | →4)-GalpA-(1→    | 22.93                  |      |
|         | 6        | 66.250               | 3,6-Me2-GalpA     | →2,4)-GalpA-(1→  | 7.65                   |      |
| PZMP3-2 | 1        | 17.720               | 2,3,5-Me3-Araf    | Araf-(1→         | 6.25                   | [21] |
|         | 2        | 19.835               | 1,2,3-Me3-Rhap    | →4)-Rhap         | 2.51                   |      |
|         | 3        | 30.543               | 2,3,6-Me3-Galp    | →4)-Galp-(1→     | 2.75                   |      |

|        |   |        |                                                                |                            |       |      |
|--------|---|--------|----------------------------------------------------------------|----------------------------|-------|------|
|        | 4 | 33.186 | 2,3,6-Me <sub>3</sub> -GalpA<br>1,2,3,6-Me <sub>4</sub> -GalpA | →4)-GalpA-(1→<br>→4)-GalpA | 84.64 |      |
|        | 5 | 34.153 | 3,6-Me <sub>2</sub> -GalpA                                     | →2,4)-GalpA-(1→            | 3.85  |      |
| PZMP4  | 1 | 38.941 | 3,4-Me <sub>2</sub> -Rhap                                      | →2)-Rhap-(1→               | 18.95 | [22] |
|        | 2 | 39.572 | 2,3,4,6-Me <sub>4</sub> -GalpA                                 | GalpA-(1→                  | 11.54 |      |
|        | 3 | 40.142 | 2,4,5-Me <sub>3</sub> -Araf                                    | →3)-Araf-(1→               | 17.56 |      |
|        | 4 | 66.252 | 2,6-Me <sub>2</sub> -GalpA                                     | →3,4)-GalpA-(1→            | 51.95 |      |
| SAZMP3 | 1 | 20.344 | 2,3,5-Me <sub>3</sub> -Araf                                    | Araf-(1→                   | 3.98  | [24] |
|        | 2 | 29.583 | 2,3,4-Me <sub>3</sub> -Rhap                                    | Rhap-(1→                   | 3.75  |      |
|        | 3 | 30.817 | 2,3,4,6-Me <sub>4</sub> -Galp                                  | Galp-(1→                   | 1.99  |      |
|        | 4 | 31.641 | 2-Me-Araf                                                      | →3,5)-Araf-(1→             | 2.95  |      |
|        | 5 | 32.333 | 3-Me-Rhap                                                      | →2,4)-Rhap-(1→             | 7.04  |      |
|        | 6 | 34.850 | 2,3,6-Me <sub>3</sub> -Galp                                    | →4)-Galp-(1→               | 74.98 |      |
|        | 7 | 35.142 | 2,4,6-Me <sub>3</sub> -Galp                                    | →3)-Galp-(1→               | 5.31  |      |
| SAZMP4 | 1 | 20.355 | 2,3,4-Me <sub>3</sub> -Rhap                                    | Rhap-(1→                   | 0.5   | [25] |
|        | 2 | 26.563 | 2,3,5-Me <sub>3</sub> -Araf                                    | Araf-(1→                   | 0.47  |      |
|        | 3 | 31.915 | 2-Me-Araf                                                      | →3,5)-Araf-(1→             | 0.46  |      |
|        | 4 | 34.707 | 3-Me-Rhap                                                      | →2,4)-Rhap-(1→             | 0.52  |      |
|        | 5 | 35.092 | 2,3,6-Me <sub>3</sub> -Galp                                    | →4)-Galp-(1→               | 28.8  |      |

**Table S2.** Assignments of <sup>1</sup>H and <sup>13</sup>C NMR spectra for *Zizyphus jujuba* cv. *Muzao* polysaccharides.

| Samples | Residues | Linkage            |   | 1             | 2              | 3     | 4     | 5          | 6     | Ref. |
|---------|----------|--------------------|---|---------------|----------------|-------|-------|------------|-------|------|
| PZMP1   | A        | →3,5)-Araf-(1→     | C | 109.95        | 82.25          | 84.12 | 86.57 | 69.07      |       | [17] |
|         |          |                    | H | 5.16          | 4.30           | 4.15  | 3.98  | 3.96       |       |      |
|         | B        | →5)-Araf-(1→       | C | 110.31        | 82.25          | 79.15 | 86.72 | 69.03      |       |      |
|         |          |                    | H | 5.10          | 4.30           | 4.15  | 4.05  | 3.85       |       |      |
|         | C        | Araf-(1→           | C | 112.14        | 82.99          | 79.30 | 85.09 | 63.94      |       |      |
|         |          |                    | H | 5.25          | 3.77           | 4.15  | 4.23  | 3.9        |       |      |
|         | D        | →5)-Araf-(1→       | C | 110.12        | 82.25          | 79.30 | 85.09 | 69.05      |       |      |
|         |          |                    | H | 5.13/5.12     | 4.30           | 4.15  | 4.23  | 3.85       |       |      |
|         | E        | →4)-Galp-(1→       | C | 105.90        | 73.26          | 72.24 | 76.63 | 75.7       | 69.05 |      |
|         |          |                    | H | 4.54          | 3.67           | 3.94  | 3.94  | 3.75       | 3.92  |      |
|         | F        | →3)-Araf-(1→       | C | 109.95        | 82.25          | 84.12 | 86.57 | 63.94      |       |      |
|         |          |                    | H | 5.16          | 4.30           | 4.15  | 3.98  | 3.92       |       |      |
| PZMP2-1 | A        | α-L-Araf-(1→       | C | 107.14/107.51 | 80.92/81.3     | 76.62 | 83.93 | 61.17      |       | [18] |
|         |          |                    | H | 4.99/5.05     | 2<br>4.03/4.20 | 3.85  | 3.94  | 3.63       |       |      |
|         | B        | →5)-α-L-Araf-(1→   | C | 107.14/107.51 | 80.92/81.3     | 76.62 | 83.93 | 66.32/66.5 |       |      |
|         |          |                    | H | 4.99/5.05     | 2<br>4.03/4.20 | 3.85  | 3.94  | 8<br>3.71  |       |      |
|         | C        | →3,5)-α-L-Araf-(1→ | C | 109.25        | 82.29          | 83.95 | 83.93 | 66.32/66.5 |       |      |
|         |          |                    | H | 5.14          | 4.12           | 3.99  | 3.94  | 8<br>3.71  |       |      |
| PZMP2-2 | A        | →3)-Araf-(1→       | C | 109.97        | 79.43          | 86.72 | 84.13 | 63.95      |       | [19] |
|         |          |                    | H | 5.16          | 3.96           | 4.04  | 4.14  | 3.84       |       |      |
|         | B        | →3)-Araf-(1→       | C | 110.29        | 81.91          | 85.10 | 84.13 | 63.95      |       |      |
|         |          |                    | H | 5.10          | 4.30           | 4.11  | 4.14  | 3.84       |       |      |
|         | C        | →3,5)-Araf-(1→     | C | 112.10        | 84.20          | 86.76 | 84.13 | 69.05      |       |      |
|         |          |                    | H | 5.25          | 4.23           | 4.05  | 4.14  | 3.85       |       |      |
|         | D        | →3)-Galp-(1→       | C | 103.28/102.97 | 70.81          | 81.61 | 71.52 | 74.14      | 63.95 |      |
|         |          |                    |   |               |                |       |       |            |       |      |
|         |          |                    |   |               |                |       |       |            |       |      |
|         |          |                    |   |               |                |       |       |            |       |      |

|         |   |                                                         |   |               |            |           |            |            |          |      |
|---------|---|---------------------------------------------------------|---|---------------|------------|-----------|------------|------------|----------|------|
| PZMP3-1 | E | $\rightarrow 4$ )-GalpA-(1 $\rightarrow$                | H | 4.97/4.91     | 3.74       | 4.47      | 4.02       | 4.72       | 3.84     | [20] |
|         |   |                                                         | C | 101.81        | 70.81      | 81.20     | 71.52      | 74.14      | 178.31   |      |
|         | F | $\rightarrow 3$ )-Galp-(1 $\rightarrow$                 | H | 5.07          | 3.74       | 4.39      | 4.02       | 4.72       |          |      |
|         |   |                                                         | C | 102.32        | 70.81      | 81.20     | 71.52      | 74.14      | 63.95    |      |
|         | G | $\rightarrow 2,4$ )-Rhap-(1 $\rightarrow$               | H | 5.12          | 3.74       | 4.39      | 4.02       | 4.72       | 3.84     |      |
|         |   |                                                         | C | 106.01        | 72.74      | 74.22     | 82.97      | 65.35      | 23.07    |      |
|         | H | Galp-(1 $\rightarrow$                                   | H | 4.54          | 3.67       | 4.79      | 3.76       | 3.57       | 2.08     |      |
|         |   |                                                         | C | 99.00         | 70.81      | 85.10     | 71.52      | 74.14      | 63.95    |      |
|         | A | $\rightarrow 4$ )-GalpA-(1 $\rightarrow$                | H | 3.74          | 3.74       | 4.11      | 4.02       | 3.50       | 3.84     |      |
|         |   |                                                         | C | 103.39        | 68.08      | 71.26     | 81.37      | 73.49      | 170.91   |      |
|         | B | $\rightarrow 2,4$ )-GalpA-(1 $\rightarrow$              | H | 5.21          | 3.77       | 4.08      | 4.42       | 4.80       |          |      |
|         |   |                                                         | C | 103.39        | 70.62      | 71.98     | 81.37      | 73.49      | 171.01   |      |
| PZMP3-2 | C | $\rightarrow 3$ )-Araf-(1 $\rightarrow$                 | H | 5.21          | 3.97       | 4.10      | 4.42       | 4.80       |          | [21] |
|         |   |                                                         | C | 107.53        | 82.26      | 84.04     | 86.79      | 63.93      |          |      |
|         | D | $\rightarrow 5$ )-Araf-(1 $\rightarrow$                 | H | 5.12          | 4.28       | 4.18      | 3.98       | 3.92       |          |      |
|         |   |                                                         | C | 109.35        | 82.26      | 79.06     | 86.79      | 68.34      |          |      |
|         | E | $\rightarrow 4$ )-Galp-(1 $\rightarrow$                 | H | 5.12          | 4.28       | 4.17      | 3.99       | 3.93       |          |      |
|         |   |                                                         | C | 100.52        | 70.56      | 80.96     | 72.01      | 74.39      | 63.67    |      |
|         | A | $\rightarrow 4$ )- $\alpha$ -D-GalpA-(1 $\rightarrow$   | H | 4.94          | 3.71       | 4.50      | 4.07       | 4.77       | 3.85     |      |
|         |   |                                                         | C | 102.43/101.96 | 70.88      | 71.54     | 80.84/81.3 | 74.19      | 173.62   |      |
|         | B | $\rightarrow 4$ )- $\beta$ -D-GalpA-(1 $\rightarrow$    | H | 5.15/5.09     | 3.75       | 4.00      | 3          | 4.70/4.78  |          |      |
|         |   |                                                         | C | 103.35/103.07 | 70.88      | 71.66     | 81.98/81.6 | 73.67      | 173.74   |      |
|         | C | $\rightarrow 4$ )- $\alpha$ -D-GalpA                    | H | 4.96/4.91     | 3.75       | 4.00      | 7          | 4.43       |          |      |
|         |   |                                                         | C | 95.13         | 70.88      | 71.54     | 80.84      | 74.19      | 173.87   |      |
| PZMP4   | D | $\rightarrow 4$ )- $\beta$ -D-GalpA                     | H | 5.29          | 3.82       | 4.00      | 4.13       | 4.27       |          | [22] |
|         |   |                                                         | C | 99.07/98.96   | 70.88      | 71.54     | 81.33      | 77.08      | 173.87   |      |
|         | E | $\alpha$ -Araf-(1 $\rightarrow$                         | H | 4.56/4.57     | 3.75       | 4.00      | 4.13       | 4.27       |          |      |
|         |   |                                                         | C | 110.37        | 81.33      | 77.76     | 85.10      | 64.01      |          |      |
|         | F | $\rightarrow 2,4$ )- $\alpha$ -D-GalpA-(1 $\rightarrow$ | H | 5.25          | 4.33       | 4.06      | 4.29       | 3.73       |          |      |
|         |   |                                                         | C | 102.43/101.96 | 79.47      | 73.21     | 80.84/81.3 | 71.54      | 173.62   |      |
|         | A | $\rightarrow 3,4$ )- $\alpha$ -D-GalpA-(1 $\rightarrow$ | H | 5.20/5.15     | 3.98       | 4.21      | 3          | 4.00       |          |      |
|         |   |                                                         | C | 101.89        | 70.79/70.9 | 79.42     | 84.05      | 73.41/73.0 | 173.68/1 |      |
|         | B | $\alpha$ -D-GalpA-(1 $\rightarrow$                      | H | 4.87          | 3          | 3.87      | 4.04       | 4          | 73.80    |      |
|         |   |                                                         | C | 102.36        | 71.45      | 70.79     | 71.59      | 74.21      | 178.21   |      |
|         | C | $\rightarrow 2$ )- $\alpha$ -L-Rhap-(1 $\rightarrow$    | H | 5.00          | 3.91       | 3.63/3.66 | 3.96       | 4.32       |          |      |
|         |   |                                                         | C | 102.36        | 84.19      | 71.45     | 74.85      | 71.60      |          |      |
| SAZMP3  | D | $\rightarrow 3$ )- $\alpha$ -L-Araf-(1 $\rightarrow$    | H | 4.82          | 4.11/4.04  | 3.86      | 3.66       | 3.96       |          | [24] |
|         |   |                                                         | C | 110.24        | 81.61      | 86.77     | 83.74      | 63.96      |          |      |
|         | A | $\rightarrow 2,4$ )- $\alpha$ -L-Rhap-(1 $\rightarrow$  | H | 5.00/5.05     | 4.20       | 3.94      | 4.02       | 3.62       |          |      |
|         |   |                                                         | C | 97.67         | 82.57      | 72.23     | 82.55      | 74.84      | 16.78    |      |
|         | B | $\rightarrow 4$ )- $\alpha$ -D-GalpA-(1 $\rightarrow$   | H | 5.21          | 3.74       | 4.08      | 3.68       | 3.19       | 1.22     |      |
|         |   |                                                         | C | 99.16         | 69.67      | 69.06     | 78.09      | 71.51      | 175.54   |      |
|         | C | $\rightarrow 3$ )- $\beta$ -D-Galp-(1 $\rightarrow$     | H | 5.03          | 3.67       | 3.96      | 4.38       | 4.70       |          |      |
|         |   |                                                         | C | 109.54        | 72.23      | 82.20     | 69.67      | 68.37      | 62.74    |      |
|         |   |                                                         | H | 4.36          | 4.18       | 3.74      | 3.67       | 3.68       | 3.96     |      |
|         |   |                                                         | C | 4.36          | 4.18       | 3.74      | 3.67       | 3.68       | 3.96     |      |
